# Supplementary material for: Mining the Synergistic Core Allosteric Modules Variation and Sequencing Pharmacological Module Drivers in a Preclinical Model of Ischemia
Source: PubMed Central journal article supplement — CPT Pharmacometrics Syst Pharmacol. 2018 Mar 14;7(4):269–80. doi: 10.1002/psp4.12281 (PMC5915616; doi:10.1002/psp4.12281), 2018-03-14
Supplement: PSP4-7-269-s002.pdf [file PSP4-7-269-s002.pdf]

**Table S1: The result of module identification by MCODE.**

| Group   | Module | Score | Nodes | Edges | Node IDs                                                                                                                                                                                                        |
|---------|--------|-------|-------|-------|-----------------------------------------------------------------------------------------------------------------------------------------------------------------------------------------------------------------|
| Vehicle | 1      | 2.75  | 8     | 22    | Carm1, Sin3a, Ncoa2, Crebbp, Ncor1, Med1, Hdac3, Ncoa3                                                                                                                                                          |
|         | 2      | 2.562 | 32    | 82    | Il17a, Il2, Ptpre, H2-Eb1, Cd8a, Tnfrsf1a, Tnf, Casp1, Il18, Cxcl2, Cd14, Cd86, Tlr2, Il23a, Tbx21, Il12a, Irf5, Nfkb1, Relb, Jun, Ptgs2, Nfkbia, Ncor2, Cdk2, Myc, Stat3, Socs3, Bcl3, Cxcl10, Csf2, Il7r, Il5 |
|         | 3      | 2.062 | 16    | 33    | Egf, Mapk3, Egfr, Akt1, Dut, Mki67, Bcl2, Casp8, F5, Hrg, F13a1, Clu, F8, Sparc, Pros1, Vwf                                                                                                                     |
|         | 4      | 2     | 11    | 22    | Il1b, Plg, Alb, Fn1, Vegfa, Ifng, Il10, Il12b, Cd40lg, Cd40, Traf6                                                                                                                                              |
|         | 5      | 2     | 15    | 30    | Nfkbib, Rel, Chuk, Cd4, Il15, Il2ra, Icam1, Il1rn, Il1a, Myd88, Irak1, Rela, Pmpcb, Nfkb2, Ikbkb                                                                                                                |
|         | 6      | 1.8   | 5     | 9     | Itgb2l, Fgg, Fgb, Itgb2, Itgax                                                                                                                                                                                  |
|         | 7      | 1.778 | 9     | 16    | Bmpr1b, Bmp2, Bmp7, Id2, Smad4, Bmpr1a, Smad5, Bmpr2, Bmp4                                                                                                                                                      |
|         | 8      | 1.714 | 7     | 12    | Cant1, Entpd4, Hprt, Entpd5, Atic, Entpd6, Gmps                                                                                                                                                                 |
|         | 9      | 1.714 | 7     | 12    | Ywhaz, Gp9, Gp1bb, Colla1, Gp5, F12, Gp1ba                                                                                                                                                                      |
|         | 10     | 1.667 | 9     | 15    | Mdh2, Ddo, Got2, Acly, Csl, Pck2, Pck1, Cs, Pcx                                                                                                                                                                 |
|         | 11     | 1.5   | 8     | 12    | Ldhb, Ldha, Tktl2, Pgm2, Tkt, Pkm2, Ldhc, Pklr                                                                                                                                                                  |
|         | 12     | 1.4   | 5     | 7     | Pten, Cdk4, Ccnd1, Irf1, Trp53                                                                                                                                                                                  |
|         | 13     | 1.4   | 5     | 7     | Odc1, Acyl, Oat, Otc, Arg2                                                                                                                                                                                      |
|         | 14     | 1.4   | 5     | 7     | Mef2c, Myod1, Srf, Myog, Mef2a                                                                                                                                                                                  |
|         | 15     | 1.385 | 13    | 18    | Ebi3, Il27ra, Il27, Fas, Fadd, Tnfsf10, Cflar, Prdx3, Txn1, Cat, Sod1, Casp3, Irf8                                                                                                                              |
|         | 16     | 1.364 | 11    | 15    | Igf1, Adipoq, Sirt1, Ppargc1a, Foxo1, Pparg, Ar, Gnrh1, Nr2c1, Thra, Rxrb                                                                                                                                       |
|         | 17     | 1.333 | 6     | 8     | Cyba, Mmp2, Ncf2, Mapk12, Cdc25b, Mapk14                                                                                                                                                                        |
|         | 18     | 1.2   | 5     | 6     | Ncf4, Nox3, Nox1, Ncf1, Rac1                                                                                                                                                                                    |
|         | 19     | 1.167 | 6     | 7     | Pdcd1lg2, Ptpn6, Grb2, Ctla4, Yes1, Lck                                                                                                                                                                         |
|         | 20     | 1.167 | 6     | 7     | Pcna, Rpa3, Rad51, Rpa2, Asf1b, Chaf1b                                                                                                                                                                          |
|         | 21     | 1.167 | 6     | 7     | Cda, Tk2, Dtymk, Itpa, Cmpk2, Dctd                                                                                                                                                                              |

|    |    |       |     |     |                                                                                                                                                                                                                                                                                                                                                                                                                                                                                                                                                                                                                                                                                                                                                                                                                      |
|----|----|-------|-----|-----|----------------------------------------------------------------------------------------------------------------------------------------------------------------------------------------------------------------------------------------------------------------------------------------------------------------------------------------------------------------------------------------------------------------------------------------------------------------------------------------------------------------------------------------------------------------------------------------------------------------------------------------------------------------------------------------------------------------------------------------------------------------------------------------------------------------------|
|    | 22 | 1     | 3   | 3   | Junb, Fosb, Fos                                                                                                                                                                                                                                                                                                                                                                                                                                                                                                                                                                                                                                                                                                                                                                                                      |
|    | 23 | 1     | 3   | 3   | Phex, Slc34a1, Fgf23                                                                                                                                                                                                                                                                                                                                                                                                                                                                                                                                                                                                                                                                                                                                                                                                 |
|    | 24 | 1     | 4   | 4   | Pbk, Nuf2, Shcbp1, Zwilch                                                                                                                                                                                                                                                                                                                                                                                                                                                                                                                                                                                                                                                                                                                                                                                            |
|    | 25 | 1     | 3   | 3   | Nip7, Eif6, Sbds                                                                                                                                                                                                                                                                                                                                                                                                                                                                                                                                                                                                                                                                                                                                                                                                     |
|    | 26 | 1     | 3   | 3   | Map3k7ip2, Ticam1, Tlr3                                                                                                                                                                                                                                                                                                                                                                                                                                                                                                                                                                                                                                                                                                                                                                                              |
|    | 27 | 1     | 3   | 3   | Cd3e, Nck1, Lcp2                                                                                                                                                                                                                                                                                                                                                                                                                                                                                                                                                                                                                                                                                                                                                                                                     |
|    | 28 | 1     | 3   | 3   | Rag1, Pax5, Cd79a                                                                                                                                                                                                                                                                                                                                                                                                                                                                                                                                                                                                                                                                                                                                                                                                    |
|    | 29 | 1     | 4   | 4   | Aco2, Idh3a, Aco1, Idh3g                                                                                                                                                                                                                                                                                                                                                                                                                                                                                                                                                                                                                                                                                                                                                                                             |
|    | 30 | 1     | 4   | 4   | Med9, Med24, Med21, Med16                                                                                                                                                                                                                                                                                                                                                                                                                                                                                                                                                                                                                                                                                                                                                                                            |
| JA | 1  | 4.056 | 18  | 73  | Rela, Myd88, Cd40, Il5, Il2, Il1b, Il13, Tnf, Icam1, Tlr4, Traf6, Nfkb1, Cxcl10, Il6, Socs3, Stat3, Ifng, Il12b                                                                                                                                                                                                                                                                                                                                                                                                                                                                                                                                                                                                                                                                                                      |
|    | 2  | 2     | 11  | 22  | Shc1, Insrr, Fyn, Grb2, Tek, Ptpn11, Egf, Fn1, Vegfa, Igf1, Insr                                                                                                                                                                                                                                                                                                                                                                                                                                                                                                                                                                                                                                                                                                                                                     |
|    | 3  | 2     | 16  | 32  | Got1, Got2, Mdh2, Idh3g, Ogdh, Idh1, Idh2, Idh3a, Nit2, Glud1, Glc, Asns, Glc2, Cth, Glul, Aldh4a1                                                                                                                                                                                                                                                                                                                                                                                                                                                                                                                                                                                                                                                                                                                   |
|    | 4  | 1.966 | 116 | 228 | Crebbp, Arnt, Ep300, Arntl, Hes6, Epas1, CBF1, Ctbp1, Nfyb, Tcf3, Crem, Trrap, Wwtr1, Arnt2, Mafb, Foxd3, Pou3f1, Hoxa10, Kdmla, Spib, Tcfe3, Dmbx1, Lmo4, Barx2, Satb2, Grin1, Nr6a1, Cacna1c, Creg1, Mga, Pax1, Atf5, Meis1, Lbx1, Ecsit, Pknox1, Tfam, Tbl1x, Pus1, Deaf1, Ikzf1, Calml3, Calm5, Dach1, Taf4b, Bsx, Tdg, Pbx1, Nrfl, Pdlim1, Pou3f2, Rcor2, Npas4, Six1, Hoxb13, Lbxcor1, Helt, Onecut3, Itpr2, Calm2, Rarg, Alx4, Nfyc, Abt1, Ncoa6, Pbx3, Hand2, Crx, Alx1, Calm4, Hoxa11, Pbx2, Itpr3, Foxh1, Tfdp2, Nr2e3, Tcf12, Pou2f3, Rbl2, Atf7ip, Nobox, Pax4, Clock, Pax7, Tle1, Rbl1, Sall4, Pax8, Ptf1a, Pou4f3, Pou5f1, Zeb1, Tcfef, Gsc, Rbpjl, Hivep2, Snai3, Tead4, Sra1, Pax3, Pou1f1, Pax2, Grin2c, Grin2d, Sfpil, Hoxd12, Pax9, Kat2b, Dazap2, Tbx2, Ankrd1, Carm1, Sox6, Ets1, Tfdp1, Tcfcp2 |
|    | 5  | 1.929 | 14  | 27  | Cd40lg, Lck, Ptpn6, Lat, Cd247, Lcp2, Il10, Cd4, Tlr2, Cd14, Cd80, Cd86, Csf2, Il1a                                                                                                                                                                                                                                                                                                                                                                                                                                                                                                                                                                                                                                                                                                                                  |
|    | 6  | 1.8   | 5   | 9   | Padi2, Hspa5, Canx, Vcp, P4hb                                                                                                                                                                                                                                                                                                                                                                                                                                                                                                                                                                                                                                                                                                                                                                                        |

|    |    |       |    |    |                                                                                                                                                                                |
|----|----|-------|----|----|--------------------------------------------------------------------------------------------------------------------------------------------------------------------------------|
|    | 7  | 1.4   | 5  | 7  | Atrx, Dnmt1, Mecp2, Mbd4, Dnmt3a                                                                                                                                               |
|    | 8  | 1.333 | 6  | 8  | Tbx21, Il17a, Il15, Irf1, Il27, Stat1                                                                                                                                          |
|    | 9  | 1.25  | 4  | 5  | Pik3ca, Egfr, Erbb2, Trp53                                                                                                                                                     |
|    | 10 | 1.25  | 4  | 5  | Mki67, Cks2, Pcna, Mad211                                                                                                                                                      |
|    | 11 | 1.25  | 8  | 10 | Pink1, Htra2, Aifm1, Cat, Nqo1, Keap1, Nfe2l2, Park7                                                                                                                           |
|    | 12 | 1.25  | 4  | 5  | Bmpr1b, Bmpr2, Bmp6, Smad1                                                                                                                                                     |
|    | 13 | 1.25  | 4  | 5  | Slc40a1, Slc11a2, Tfrc, Hfe                                                                                                                                                    |
|    | 14 | 1.25  | 4  | 5  | Kidins220, Crk, Ywhab, Braf                                                                                                                                                    |
|    | 15 | 1.2   | 5  | 6  | Brix1, Abce1, Pno1, Emg1, Taf9                                                                                                                                                 |
|    | 16 | 1.2   | 5  | 6  | Cdc25b, Cdc25c, Chek1, Cdc25a, Ccnb2                                                                                                                                           |
|    | 17 | 1     | 3  | 3  | Timp1, Mmp9, Jun                                                                                                                                                               |
|    | 18 | 1     | 3  | 3  | Bdnf, Ntf5, Ntrk3                                                                                                                                                              |
|    | 19 | 1     | 3  | 3  | Pten, Pik3r2, Pip4k2c                                                                                                                                                          |
|    | 20 | 1     | 3  | 3  | Gdf11, Acvr2a, Acvr1b                                                                                                                                                          |
|    | 21 | 1     | 3  | 3  | Hspa8, Hspd1, Hsph1                                                                                                                                                            |
|    | 22 | 1     | 3  | 3  | Ctgf, Apoa1, Agt                                                                                                                                                               |
|    | 23 | 1     | 4  | 4  | Oprm1, Oprd1, Oprk1, Penk                                                                                                                                                      |
|    | 24 | 1     | 4  | 4  | Mafg, Nfe2, Mafk, Mare                                                                                                                                                         |
| UA | 1  | 4.55  | 20 | 91 | Prc1, Spc25, Cks2, Kif20a, Kif11, Ect2, Rrm2, Cks1b, Mki67, Top2a, Cdk1, Ncaph, Mad211, Cenpn, Cdc20, Incenp, Ccna2, Ccnb1, Plk1, Ccnb2                                        |
|    | 2  | 2.963 | 27 | 80 | Il18, Irf5, Il12b, Cd80, Ifng, Ptprc, Cd14, Tlr2, Nfkb1a, Ikbkg, Chuk, Nfkbib, Ikbkb, Nfkb2, Il17a, Il10, Il13, Cd4, Il1r1, Casp1, Il1b, Nod2, Tnf, Cxcl10, Cxcl2, Il1rn, Il1a |
|    | 3  | 2.667 | 12 | 32 | Traf6, Cd40, Cd86, Nfkb1, Il6, Csf2, Il5, Il23a, Tlr4, Tlr5, Irak1, Tlr9                                                                                                       |
|    | 4  | 2.4   | 10 | 24 | Kng2, Alb, A2m, Hrg, Serping1, Clu, Kng1, Sparc, Fn1, Klkb1                                                                                                                    |
|    | 5  | 2.08  | 25 | 52 | Ghr, Igfbp4, Igf2, Igfbp5, Pappa, Igf1, Pitx2, Nkx2-5, Tcf4, Tcf7l2, Tcfap2a, Cebpb, Kat2a, Cops5,                                                                             |

|    |       |       |    |                                                                                                                                                                                                                                                                                                                                                                            |                                                                                                                                             |
|----|-------|-------|----|----------------------------------------------------------------------------------------------------------------------------------------------------------------------------------------------------------------------------------------------------------------------------------------------------------------------------------------------------------------------------|---------------------------------------------------------------------------------------------------------------------------------------------|
|    |       |       |    | Pou2f1, Grin2d, Myst2, Crebbp, Grin2c, Grin2b, Grin1, Grin2a, Ep300, Stat5a, Prl                                                                                                                                                                                                                                                                                           |                                                                                                                                             |
| 6  | 1.709 | 55    | 94 | Ikbke, Bcl2, Bcl2l11, Pik3r1, Lat, Sykb, Lcp2, Pin1, Mdk, Zhx2, Raf1, Ywhab, Map2k2, Mapk1, Eps15l1, Grb2, Eps15, Cltc, Cbl, Src, Vwf, Itgb3, Bear1, Itga2b, Ptpn1, Mlh1, Rfc1, Atf2, Gadd45a, Myst1, Pbrm1, Zwi1ch, Hmnr, Melk, Shebp1, Bub1b, Cbx5, Bub1, Trp53bp1, Brca1, Erbb2, Erbb3, Akt1, Nos3, Sirt1, Lep, Cntf, Lif, Stat1, Ifih1, Ccl5, Ddx58, Ifnb1, Tank, Irf3 |                                                                                                                                             |
| 7  | 1.588 | 17    | 27 | Relb, Icam1, Cd44, Il2ra, Shc1, Egfr, Stat3, Socs3, Stat6, Il2, Jun, Mcm4, Cdc6, Mcm3, Rb1, Ccnd1, Pmpcb                                                                                                                                                                                                                                                                   |                                                                                                                                             |
| 8  | 1.5   | 6     | 9  | Rad50, Chek2, Msh6, Msh2, Ung, Fen1                                                                                                                                                                                                                                                                                                                                        |                                                                                                                                             |
| 9  | 1.429 | 7     | 10 | Uqcrf5, Ppa1, Ppa2, Atp5b, Lhpp, Atp5j, Uqcr                                                                                                                                                                                                                                                                                                                               |                                                                                                                                             |
| 10 | 1.4   | 5     | 7  | Irak2, Tlr3, Tlr6, Tirap, Myd88                                                                                                                                                                                                                                                                                                                                            |                                                                                                                                             |
| 11 | 1.333 | 9     | 12 | Plcb3, Plcb2, Plcb4, Mpl, Jak2, Epor, Kitl, Plcb1, Pik3ca                                                                                                                                                                                                                                                                                                                  |                                                                                                                                             |
| 12 | 1.25  | 4     | 5  | Ckap2, Birc5, Aurkb, Pbk                                                                                                                                                                                                                                                                                                                                                   |                                                                                                                                             |
| 13 | 1.25  | 4     | 5  | Ide, Mme, Psen2, App                                                                                                                                                                                                                                                                                                                                                       |                                                                                                                                             |
| 14 | 1.2   | 5     | 6  | Mcm7, Rpa2, Pole2, Rpa3, Rpa1                                                                                                                                                                                                                                                                                                                                              |                                                                                                                                             |
| 15 | 1.2   | 5     | 6  | Uqcrc2, Ndufa5, Ndubf3, Uqcrh, Uqcrb                                                                                                                                                                                                                                                                                                                                       |                                                                                                                                             |
| 16 | 1.2   | 5     | 6  | Carm1, Ncoa2, Grip1, Ncoa3, Sin3a                                                                                                                                                                                                                                                                                                                                          |                                                                                                                                             |
| 17 | 1     | 4     | 4  | Atp5h, Cox6b1, Ndufs7, Ndufv2                                                                                                                                                                                                                                                                                                                                              |                                                                                                                                             |
| 18 | 1     | 4     | 4  | Spp1, Itgb1, Vtn, Itga4                                                                                                                                                                                                                                                                                                                                                    |                                                                                                                                             |
| 19 | 1     | 4     | 4  | Oprm1, Oprd1, Oprk1, Penk                                                                                                                                                                                                                                                                                                                                                  |                                                                                                                                             |
| JU | 1     | 4.545 | 11 | 50                                                                                                                                                                                                                                                                                                                                                                         | Ccnb2, Mki67, Mad2l1, Cdc20, Cdca8, Top2a, Birc5, Kif11, Pre1, Ccnb1, Ccna2                                                                 |
|    | 2     | 4.308 | 13 | 56                                                                                                                                                                                                                                                                                                                                                                         | Myd88, Il6, Tlr2, Tnf, Il12b, Tlr4, Il1a, Il18, Ifng, Cd80, Il10, Il23a, Il17a                                                              |
|    | 3     | 2.25  | 16 | 36                                                                                                                                                                                                                                                                                                                                                                         | Il5, Socs3, Stat3, Rela, Cd14, Cd86, Cd4, Il2, Traf6, Tnfrsf1a, Il1b, Cxcl10, Stat1, Cd40, Csf2, Il13                                       |
|    | 4     | 2     | 23 | 46                                                                                                                                                                                                                                                                                                                                                                         | Alb, Vegfa, Hrg, Egf, Clu, Sparc, Myc, Rb1, Ccne1, Ccne2, Skp2, Ccnd1, Cdkn2a, Cdk4, Skp1a, Plg, Mmp9, Timp1, Lep, Igf1, Foxo3, FasL, Tgfb1 |
|    | 5     | 1.875 | 8  | 15                                                                                                                                                                                                                                                                                                                                                                         | Aurkb, Rrm2, Cdk1, Kif20a, Plk1, Bub1, Ect2, NcapH                                                                                          |

|    |       |    |    |                                                                                                  |
|----|-------|----|----|--------------------------------------------------------------------------------------------------|
| 6  | 1.8   | 10 | 18 | Itgb3bp, Psen1, Ngfr, Psen2, Arntl, Per3, Timeless, Per1, Clock, Ncstn                           |
| 7  | 1.714 | 7  | 12 | Tbxa2r, Gnaq, Gna14, Rgs2, Gna11, ORP-2, Gna15                                                   |
| 8  | 1.571 | 7  | 11 | Fn1, Itga2b, Ibsp, Itga2, Itgb6, Nid1, Vtn                                                       |
| 9  | 1.417 | 12 | 17 | Ptpnc, Lck, Grb2, Erbb2, Erbb3, Akt1, Gsk3b, Fyn, Cd44, Foxp3, Il2ra, Fas                        |
| 10 | 1.4   | 15 | 21 | Map2k1, Mdk, Map2k2, Mapk1, Pxn, Itga5, Isg15, Ddx58, Tbk1, Ifnb1, Tlr8, Irf7, Spp1, Itgb1, Ptk2 |
| 11 | 1.333 | 6  | 8  | Gen1, Lig4, Xrcc6, Xrcc4, Wrm, Xrcc5                                                             |
| 12 | 1.2   | 5  | 6  | Myc                                                                                              |
| 13 | 1.2   | 5  | 6  | Bcl2, Dut, Pcn, Rfc4, Rpa1                                                                       |
| 14 | 1.2   | 5  | 6  | Nr4a2, Nr5a1, Rxrb, Nr5a2, Thra                                                                  |
| 15 | 1     | 3  | 3  | Pten, Cdkn1b, Trp53                                                                              |
| 16 | 1     | 3  | 3  | Ntrk2, Ntrk1, Bdnf                                                                               |
| 17 | 1     | 4  | 4  | Cep55, Melk, Kif22, Hmnr                                                                         |
| 18 | 1     | 3  | 3  | Ptges2, Tbxas1, Ptgs                                                                             |
| 19 | 1     | 4  | 4  | Ppargc1a, Creb1, Ddit3, Atf2                                                                     |
| 20 | 1     | 3  | 3  | Zfp2, Lhx9, Gata4                                                                                |
| 21 | 1     | 3  | 3  | Ace, Gm9847, Ren1                                                                                |
| 22 | 1     | 3  | 3  | Scg2, Scg3, Chga                                                                                 |
| 23 | 1     | 4  | 4  | Tgfbr2, Smad2, Tgfbr1, Smad7                                                                     |
| 24 | 1     | 3  | 3  | Rps3, Eif3a, Abce1                                                                               |
| 25 | 1     | 4  | 4  | Pik3r5, Pip4k2c, Pik3cg, Inpp5d                                                                  |
| 26 | 1     | 4  | 4  | Irs1, Pik3r2, Itgam, Pik3cb                                                                      |
| 27 | 1     | 3  | 3  | Uba52, Sumo1, Pias1                                                                              |
| 28 | 1     | 4  | 4  | Oprm1, Oprd1, Oprk1, Penk                                                                        |
| 29 | 1     | 4  | 4  | Cald1, Tpm4, Vcl, Tpm1                                                                           |

**Table S2: The overlapping GO terms (Biological Process) of each group.**

| <b>Group</b> | <b>GO terms (Biological Process)</b>                                                                                                                                                                                                                                                                                                                                                                                                                                                                                                                                                                                                                                                                            |
|--------------|-----------------------------------------------------------------------------------------------------------------------------------------------------------------------------------------------------------------------------------------------------------------------------------------------------------------------------------------------------------------------------------------------------------------------------------------------------------------------------------------------------------------------------------------------------------------------------------------------------------------------------------------------------------------------------------------------------------------|
| JA and JU:16 | regulation of cytokine biosynthetic process<br>positive regulation of cytokine biosynthetic process<br>positive regulation of interleukin-6 biosynthetic process<br>regulation of immunoglobulin secretion<br>positive regulation of isotype switching to IgG isotypes<br>positive regulation of interleukin-12 biosynthetic process<br>regulation of defense response<br>regulation of transcription from RNA polymerase II promoter<br>anatomical structure morphogenesis<br>cell death<br>death<br>negative regulation of insulin receptor signaling pathway<br>morphogenesis of a branching structure<br>mammary gland development<br>multicellular organismal process<br>branching morphogenesis of a tube |
| JA and UA:95 | regulation of interleukin-6 production<br>positive regulation of protein kinase cascade<br>positive regulation of lymphocyte proliferation<br>positive regulation of mononuclear cell proliferation<br>positive regulation of leukocyte proliferation<br>regulation of lymphocyte activation<br>regulation of leukocyte activation<br>regulation of protein kinase cascade                                                                                                                                                                                                                                                                                                                                      |

---

regulation of cell activation  
regulation of mononuclear cell proliferation  
regulation of lymphocyte proliferation  
positive regulation of signal transduction  
regulation of leukocyte proliferation  
positive regulation of cell communication  
positive regulation of transcription factor activity  
positive regulation of DNA binding  
positive regulation of binding  
regulation of chemokine production  
positive regulation of MAPKKK cascade  
regulation of transcription factor activity  
positive regulation of stress-activated protein kinase signaling pathway  
positive regulation of JNK cascade  
positive regulation of multicellular organismal process  
positive regulation of interleukin-6 production  
regulation of DNA binding  
positive regulation of NF-kappaB transcription factor activity  
regulation of binding  
regulation of MAPKKK cascade  
regulation of signal transduction  
positive regulation of I-kappaB kinase/NF-kappaB cascade  
positive regulation of chemokine biosynthetic process  
regulation of I-kappaB kinase/NF-kappaB cascade  
regulation of cell communication  
regulation of cellular biosynthetic process

---

---

regulation of biosynthetic process  
regulation of JNK cascade  
regulation of stress-activated protein kinase signaling pathway  
regulation of B cell activation  
regulation of adaptive immune response  
regulation of adaptive immune response based on somatic recombination of immune receptors built from immunoglobulin superfamily domains  
positive regulation of response to stimulus  
positive regulation of T cell activation  
regulation of cellular response to stress  
regulation of nucleobase, nucleoside, nucleotide and nucleic acid metabolic process  
regulation of nitrogen compound metabolic process  
activation of innate immune response  
protein kinase cascade  
regulation of T cell activation  
defense response to bacterium  
signal transduction  
regulation of molecular function  
positive regulation of molecular function  
regulation of immunoglobulin mediated immune response  
regulation of B cell mediated immunity  
positive regulation of T cell proliferation  
regulation of gene expression  
positive regulation of innate immune response  
positive regulation of protein transport  
leukocyte migration

---



---

regulation of innate immune response  
immune response-regulating signal transduction  
positive regulation of defense response  
regulation of T cell proliferation  
regulation of lymphocyte mediated immunity  
regulation of leukocyte mediated immunity  
intracellular signaling cascade  
cellular response to stimulus  
hemopoietic or lymphoid organ development  
adaptive immune response based on somatic recombination of immune receptors built from immunoglobulin superfamily domains  
adaptive immune response  
activation of immune response  
immune system development  
positive regulation of MHC class II biosynthetic process  
taxis  
chemotaxis  
locomotion  
positive regulation of transport  
positive regulation of immune response  
behavior  
pattern recognition receptor signaling pathway  
leukocyte differentiation  
transmembrane receptor protein tyrosine kinase signaling pathway  
enzyme linked receptor protein signaling pathway  
protein amino acid phosphorylation

---

---

phosphorylation  
phosphorus metabolic process  
phosphate metabolic process  
post-translational protein modification  
protein modification process  
biopolymer modification  
reproductive developmental process  
cellular protein metabolic process  
cellular macromolecule metabolic process  
peptidyl-amino acid modification  
protein metabolic process

---

UA and JU:10

positive regulation of apoptosis  
positive regulation of programmed cell death  
positive regulation of cell death  
regulation of apoptosis  
regulation of biological quality  
regulation of programmed cell death  
regulation of cell death  
homeostatic process  
regulation of cell differentiation  
cell cycle

---

JA, UA and JU:93

immune system process  
immune response  
regulation of cytokine production  
positive regulation of cellular process  
positive regulation of biological process

---

---

positive regulation of macromolecule metabolic process  
positive regulation of cellular metabolic process  
regulation of response to stimulus  
positive regulation of metabolic process  
positive regulation of macromolecule biosynthetic process  
positive regulation of cellular biosynthetic process  
positive regulation of biosynthetic process  
regulation of immune response  
regulation of immune system process  
positive regulation of nitrogen compound metabolic process  
regulation of multicellular organismal process  
positive regulation of cell proliferation  
defense response  
positive regulation of lymphocyte activation  
positive regulation of leukocyte activation  
positive regulation of cell activation  
positive regulation of nucleobase, nucleoside, nucleotide and nucleic acid metabolic process  
regulation of interleukin-12 production  
positive regulation of immune system process  
inflammatory response  
regulation of secretion  
response to stimulus  
positive regulation of cytokine production  
positive regulation of transcription, DNA-dependent  
positive regulation of RNA metabolic process  
regulation of immunoglobulin production

---

---

regulation of cellular localization  
regulation of phosphorylation  
positive regulation of transcription  
regulation of phosphate metabolic process  
regulation of phosphorus metabolic process  
positive regulation of gene expression  
regulation of protein secretion  
regulation of production of molecular mediator of immune response  
regulation of cell proliferation  
response to wounding  
response to other organism  
regulation of localization  
regulation of protein amino acid phosphorylation  
response to external stimulus  
regulation of macromolecule metabolic process  
cytokine-mediated signaling pathway  
regulation of transport  
regulation of cellular metabolic process  
response to bacterium  
regulation of protein transport  
regulation of protein modification process  
response to biotic stimulus  
regulation of metabolic process  
regulation of establishment of protein localization  
regulation of response to stress  
regulation of protein metabolic process

---

---

multi-organism process  
response to stress  
regulation of immune effector process  
regulation of protein localization  
regulation of primary metabolic process  
positive regulation of cellular protein metabolic process  
positive regulation of protein metabolic process  
positive regulation of peptidyl-tyrosine phosphorylation  
regulation of macromolecule biosynthetic process  
regulation of cellular protein metabolic process  
regulation of cellular process  
response to molecule of bacterial origin  
regulation of peptidyl-tyrosine phosphorylation  
regulation of developmental process  
positive regulation of protein amino acid phosphorylation  
regulation of biological process  
positive regulation of phosphorylation  
positive regulation of transcription from RNA polymerase II promoter  
positive regulation of phosphorus metabolic process  
positive regulation of phosphate metabolic process  
negative regulation of biological process  
biological regulation  
positive regulation of protein modification process  
cell activation  
response to organic substance  
organ development

---

---

response to chemical stimulus  
response to lipopolysaccharide  
system development  
negative regulation of cellular process  
anatomical structure development  
positive regulation of developmental process  
leukocyte activation  
negative regulation of response to stimulus  
multicellular organismal development  
developmental process

---

UA:77

regulation of interleukin-1 secretion  
regulation of interleukin-1 beta secretion  
positive regulation of interleukin-1 secretion  
positive regulation of interleukin-1 production  
positive regulation of interleukin-1 beta production  
positive regulation of interleukin-1 beta secretion  
immune response-activating signal transduction  
positive regulation of cytokine secretion  
response to peptidoglycan  
innate immune response-activating signal transduction  
regulation of interleukin-1 beta production  
regulation of interleukin-1 production  
regulation of cytokine secretion  
positive regulation of tumor necrosis factor production  
neutrophil chemotaxis  
positive regulation of protein secretion

---

---

cell proliferation  
hemopoiesis  
cell chemotaxis  
regulation of tumor necrosis factor production  
leukocyte chemotaxis  
I-kappaB kinase/NF-kappaB cascade  
negative regulation of molecular function  
leukocyte homeostasis  
cytokine production  
negative regulation of signal transduction  
positive regulation of secretion  
negative regulation of cell communication  
I-kappaB phosphorylation  
negative regulation of interleukin-12 production  
nucleotide-binding oligomerization domain containing signaling pathway  
regulation of vascular endothelial growth factor production  
nucleotide-binding oligomerization domain containing 2 signaling pathway  
fever  
positive regulation vascular endothelial growth factor production  
negative regulation of immune system process  
T cell differentiation  
locomotory behavior  
cell migration  
positive regulation of humoral immune response  
response to lipoteichoic acid  
positive regulation of humoral immune response mediated by circulating immunoglobulin

---

---

response to muramyl dipeptide  
lipopolysaccharide-mediated signaling pathway  
placenta development  
response to peptide hormone stimulus  
response to hormone stimulus  
female gamete generation  
response to endogenous stimulus  
cell-substrate adhesion  
response to insulin stimulus  
organelle organization  
cellular process  
insulin receptor signaling pathway  
cellular component organization  
nerve growth factor receptor signaling pathway  
cellular response to insulin stimulus  
cellular response to stress  
multicellular organism reproduction  
reproductive process in a multicellular organism  
cell-matrix adhesion  
response to exogenous dsRNA  
macromolecule metabolic process  
B cell receptor signaling pathway  
cellular response to hormone stimulus  
gamete generation  
reproductive structure development  
negative regulation of developmental process

---



---

embryonic placenta development  
T cell homeostasis  
integrin-mediated signaling pathway  
response to virus  
sexual reproduction  
response to dsRNA  
peptidyl-serine phosphorylation  
cell cycle process  
negative regulation of cell proliferation

---

JU:30

regulation of cell cycle  
negative regulation of apoptosis  
negative regulation of programmed cell death  
negative regulation of cell death  
anti-apoptosis  
cell development  
cell differentiation  
cell division  
cellular developmental process  
gland development  
mammary gland alveolus development  
myeloid cell differentiation  
rhythmic process  
developmental growth  
positive regulation of myeloid cell differentiation  
homeostasis of number of cells  
G1/S transition of mitotic cell cycle

---

---

induction of programmed cell death  
induction of apoptosis  
tube morphogenesis  
positive regulation of cell differentiation  
erythrocyte differentiation  
interphase of mitotic cell cycle  
erythrocyte homeostasis  
interphase  
regulation of myeloid cell differentiation  
growth  
regulation of homeostatic process  
regulation of epithelial cell proliferation  
female sex differentiation

---

JA:44

regulation of chemokine biosynthetic process  
regulation of interleukin-12 biosynthetic process  
regulation of interleukin-6 biosynthetic process  
positive regulation of B cell activation  
regulation of isotype switching to IgG isotypes  
positive regulation of isotype switching  
positive regulation of DNA recombination  
acute inflammatory response  
regulation of isotype switching  
regulation of transcription, DNA-dependent  
regulation of RNA metabolic process  
positive regulation of B cell proliferation  
regulation of DNA recombination

---

---

regulation of transcription  
positive regulation of DNA metabolic process  
acute-phase response  
regulation of B cell proliferation  
apoptosis  
programmed cell death  
regulation of DNA metabolic process  
neutrophil apoptosis  
negative regulation of metabolic process  
regulation of growth  
negative regulation of transport  
myeloid cell apoptosis  
antigen processing and presentation  
neutrophil homeostasis  
regulation of MHC class II biosynthetic process  
positive regulation of peptidyl-serine phosphorylation  
epithelial cell proliferation involved in salivary gland morphogenesis  
positive regulation of tyrosine phosphorylation of STAT protein  
positive regulation of activated T cell proliferation  
regulation of insulin receptor signaling pathway  
cell surface receptor linked signal transduction  
MAPKKK cascade  
peptidyl-tyrosine modification  
peptidyl-tyrosine phosphorylation  
reproductive process  
reproduction

---

---

protein amino acid autophosphorylation  
chemical homeostasis  
positive regulation of protein kinase activity  
positive regulation of kinase activity  
positive regulation of transferase activity

---

**Table S3: Classification of GO functions of core module related to cerebral ischemia document verification**

| <b>Category</b>               | <b>Reference</b>                         | <b>Category</b>                 | <b>Reference</b>              |
|-------------------------------|------------------------------------------|---------------------------------|-------------------------------|
| Metabolism                    | (Egi et al., 2011; Mies et al., 1991)    | response to endogenous stimulus | (Mirante et al., 2013)        |
| Biosynthesis                  | (Wu et al., 2012)                        | Growth                          | (Ma et al., 2011)             |
| cell communication            | (Rami et al., 2001)                      | Death                           | (Bodalia et al., 2013)        |
| cell proliferation            | (Zhang et al., 2001)                     | morphogenesis                   | (Anselmino et al., 2014)      |
| response to external stimulus | (Speetzen et al., 2013)                  | reproduction                    | (Mitka, 2014)                 |
| protein modification          | (Mirante et al., 2013)                   | cell cycle                      | (Adibhatla and Hatcher, 2010) |
| transport                     | (Andres et al., 2011)                    | behavior                        | (Noh et al., 2011)            |
| cell differentiation          | (Zhang et al., 2001; Zhang et al., 2011) | development                     | (Kozoriz et al., 2013)        |
| response to stress            | (Ahmad et al., 2012)                     |                                 |                               |

## Reference

- Adibhatla, R.M., and Hatcher, J.F. (2010). Protection by D609 through cell-cycle regulation after stroke. *Molecular neurobiology* *41*, 206-217.
- Ahmad, A., Khan, M.M., Javed, H., Raza, S.S., Ishrat, T., Khan, M.B., Safhi, M.M., and Islam, F. (2012). Edaravone ameliorates oxidative stress associated cholinergic dysfunction and limits apoptotic response following focal cerebral ischemia in rat. *Molecular and cellular biochemistry* *367*, 215-225.
- Andres, R.H., Horie, N., Slikker, W., Keren-Gill, H., Zhan, K., Sun, G., Manley, N.C., Pereira, M.P., Sheikh, L.A., McMillan, E.L., *et al.* (2011). Human neural stem cells enhance structural plasticity and axonal transport in the ischaemic brain. *Brain : a journal of neurology* *134*, 1777-1789.
- Anselmino, M., Scaglione, M., Di Biase, L., Gili, S., Santangeli, P., Corsinovi, L., Pianelli, M., Cesarani, F., Faletti, R., Righi, D., *et al.* (2014). Left atrial appendage morphology and silent cerebral ischemia in patients with atrial fibrillation. *Heart rhythm : the official journal of the Heart Rhythm Society* *11*, 2-7.
- Bodalia, A., Li, H., and Jackson, M.F. (2013). Loss of endoplasmic reticulum Ca<sup>2+</sup> homeostasis: contribution to neuronal cell death during cerebral ischemia. *Acta pharmacologica Sinica* *34*, 49-59.
- Egi, Y., Matsuura, S., Maruyama, T., Fujio, M., Yuki, S., and Akira, T. (2011). Neuroprotective effects of a novel water-soluble poly(ADP-ribose) polymerase-1 inhibitor, MP-124, in in vitro and in vivo models of cerebral ischemia. *Brain research* *1389*, 169-176.
- Kozoriz, M.G., Lai, S., Vega, J.L., Saez, J.C., Sin, W.C., Bechberger, J.F., and Naus, C.C. (2013). Cerebral ischemic injury is enhanced in a model of oculodentodigital dysplasia. *Neuropharmacology* *75*, 549-556.
- Ma, Y., Qu, Y., and Fei, Z. (2011). Vascular endothelial growth factor in cerebral ischemia. *Journal of neuroscience research* *89*, 969-978.
- Mies, G., Ishimaru, S., Xie, Y., Seo, K., and Hossmann, K.A. (1991). Ischemic thresholds of cerebral protein synthesis and energy state following middle cerebral artery occlusion in rat. *Journal of cerebral blood flow and metabolism : official journal of the International Society of Cerebral Blood Flow and Metabolism* *11*, 753-761.
- Mirante, O., Price, M., Puentes, W., Castillo, X., Benakis, C., Thevenet, J., Monard, D., and Hirt, L. (2013). Endogenous protease nexin-1 protects against cerebral ischemia. *International journal of molecular sciences* *14*, 16719-16731.
- Mitka, M. (2014). New guidelines focus on preventing stroke in women. *JAMA : the journal of the American Medical Association* *311*, 1003-1004.
- Noh, S.J., Lee, S.H., Shin, K.Y., Lee, C.K., Cho, I.H., Kim, H.S., and Suh, Y.H. (2011). SP-8203 reduces oxidative stress via SOD activity and behavioral deficit in cerebral ischemia. *Pharmacology, biochemistry, and behavior* *98*, 150-154.
- Rami, A., Volkmann, T., and Winckler, J. (2001). Effective reduction of neuronal death by inhibiting gap junctional intercellular communication in a rodent model of global transient cerebral ischemia. *Experimental neurology* *170*, 297-304.
- Speetzen, L.J., Endres, M., and Kunz, A. (2013). Bilateral common carotid artery occlusion as an adequate preconditioning stimulus to induce early ischemic tolerance to focal cerebral ischemia. *Journal of visualized experiments : JoVE*, e4387.

Wu, L., Miao, S., Zou, L.B., Wu, P., Hao, H., Tang, K., Zeng, P., Xiong, J., Li, H.H., Wu, Q., *et al.* (2012). Lipoxin A4 inhibits 5-lipoxygenase translocation and leukotrienes biosynthesis to exert a neuroprotective effect in cerebral ischemia/reperfusion injury. *Journal of molecular neuroscience* : MN 48, 185-200.

Zhang, R.L., Zhang, Z.G., Zhang, L., and Chopp, M. (2001). Proliferation and differentiation of progenitor cells in the cortex and the subventricular zone in the adult rat after focal cerebral ischemia. *Neuroscience* 105, 33-41.

Zhang, Z., Jin, D., Yang, Z., Shen, B., and Liu, M. (2011). Effects of 17beta-estradiol pre-treated adult neural stem cells on neuronal differentiation and neurological recovery in rats with cerebral ischemia. *Brain injury* : [BI] 25, 227-236.

**Table S4: The overlapping pathway of each group.**

| <b>Group</b>     | <b>KEGG Pathway</b>                                                                                                                                                                                                                                                                                                                                |
|------------------|----------------------------------------------------------------------------------------------------------------------------------------------------------------------------------------------------------------------------------------------------------------------------------------------------------------------------------------------------|
| JA and JU:2      | Intestinal immune network for IgA production<br>Autoimmune thyroid disease                                                                                                                                                                                                                                                                         |
| JA and UA:5      | Acute myeloid leukemia<br>Focal adhesion<br>Natural killer cell mediated cytotoxicity<br>Renal cell carcinoma<br>ErbB signaling pathway                                                                                                                                                                                                            |
| UA and JU:7      | Small cell lung cancer<br>Endometrial cancer<br>Fc epsilon RI signaling pathway<br>Non-small cell lung cancer<br>Melanoma<br>Bladder cancer<br>Cell cycle                                                                                                                                                                                          |
| JA, UA and JU:21 | Toll-like receptor signaling pathway<br>Cytokine-cytokine receptor interaction<br>Jak-STAT signaling pathway<br>Allograft rejection<br>NOD-like receptor signaling pathway<br>RIG-I-like receptor signaling pathway<br>Cytosolic DNA-sensing pathway<br>T cell receptor signaling pathway<br>Graft-versus-host disease<br>Type I diabetes mellitus |



|       |                                                                                                                                                                                                                                                                                                                                                                                                                                                                                      |
|-------|--------------------------------------------------------------------------------------------------------------------------------------------------------------------------------------------------------------------------------------------------------------------------------------------------------------------------------------------------------------------------------------------------------------------------------------------------------------------------------------|
|       | <p>Adipocytokine signaling pathway</p> <p>Apoptosis</p> <p>Asthma</p> <p>Hematopoietic cell lineage</p> <p>MAPK signaling pathway</p> <p>Pathways in cancer</p> <p>Chemokine signaling pathway</p> <p>Pancreatic cancer</p> <p>Glioma</p> <p>Prostate cancer</p> <p>Chronic myeloid leukemia</p>                                                                                                                                                                                     |
| UA:14 | <p>B cell receptor signaling pathway</p> <p>Systemic lupus erythematosus</p> <p>Primary immunodeficiency</p> <p>VEGF signaling pathway</p> <p>Colorectal cancer</p> <p>Neurotrophin signaling pathway</p> <p>Insulin signaling pathway</p> <p>Fc gamma R-mediated phagocytosis</p> <p>Progesterone-mediated oocyte maturation</p> <p>Gap junction</p> <p>Regulation of actin cytoskeleton</p> <p>GnRH signaling pathway</p> <p>Adherens junction</p> <p>ECM-receptor interaction</p> |
| JU:2  | <p>p53 signaling pathway</p>                                                                                                                                                                                                                                                                                                                                                                                                                                                         |

---

---

Oocyte meiosis

**Table S5: The top 10 Biological Process of GO and KEGG Pathway of core module.**

| <b>Module</b>    | <b>Nodes</b> | <b>Edges</b> | <b>GO</b>      | <b>GO terms (Biological Process)</b>                                                         | <b>KEGG</b>    | <b>KEGG Pathways</b>                        |
|------------------|--------------|--------------|----------------|----------------------------------------------------------------------------------------------|----------------|---------------------------------------------|
|                  |              |              | <b>p-value</b> |                                                                                              | <b>p-value</b> |                                             |
| <b>Vehicle-2</b> | 32           | 82           | 1.0E-13        | immune system process (20)                                                                   | 4.2E-8         | Toll-like receptor signaling pathway (10)   |
|                  |              |              | 5.0E-14        | positive regulation of biological process (24)                                               | 3.4E-7         | Cytokine-cytokine receptor interaction (12) |
|                  |              |              | 1.0E-13        | immune response (17)                                                                         | 1.5E-6         | T cell receptor signaling pathway (9)       |
|                  |              |              | 7.3E-13        | positive regulation of cellular process (22)                                                 | 8.0E-6         | Jak-STAT signaling pathway (9)              |
|                  |              |              | 5.1E-11        | response to stimulus (25)                                                                    | 3.5E-5         | Hematopoietic cell lineage (7)              |
|                  |              |              | 3.5E-9         | positive regulation of nitrogen compound metabolic process (14)                              | 8.6E-5         | Allograft rejection (6)                     |
|                  |              |              | 4.9E-9         | positive regulation of metabolic process (15)                                                | 1.0E-4         | NOD-like receptor signaling pathway (6)     |
|                  |              |              | 2.6E-8         | positive regulation of macromolecule metabolic process (14)                                  | 1.3E-4         | Adipocytokine signaling pathway (6)         |
|                  |              |              | 2.9E-8         | positive regulation of cellular metabolic process (14)                                       | 9.8E-4         | Cytosolic DNA-sensing pathway (5)           |
|                  |              |              | 2.7E-8         | positive regulation of nucleobase, nucleoside, nucleotide and nucleic acid metabolic process | 1.5E-3         | Type I diabetes mellitus (5)                |

| (13)        |    |    |         |                                                                     |         |                                             |
|-------------|----|----|---------|---------------------------------------------------------------------|---------|---------------------------------------------|
| <b>JA-1</b> | 18 | 73 | 1.2E-14 | immune system process (16)                                          | 1.2E-12 | Toll-like receptor signaling pathway (11)   |
|             |    |    | 3.1E-12 | immune response (13)                                                | 1.6E-7  | Cytokine-cytokine receptor interaction (10) |
|             |    |    | 3.7E-12 | regulation of cytokine production (10)                              | 1.9E-6  | Jak-STAT signaling pathway (8)              |
|             |    |    | 6.6E-12 | positive regulation of cellular process (16)                        | 5.6E-6  | Allograft rejection (6)                     |
|             |    |    | 3.3E-11 | positive regulation of biological process (16)                      | 6.3E-6  | NOD-like receptor signaling pathway (6)     |
|             |    |    | 3.5E-11 | positive regulation of macromolecule metabolic process (13)         | 8.4E-6  | RIG-I-like receptor signaling pathway (6)   |
|             |    |    | 3.7E-11 | positive regulation of cellular metabolic process (13)              | 1.1E-4  | Cytosolic DNA-sensing pathway (5)           |
|             |    |    | 4.8E-11 | regulation of cytokine biosynthetic process (8)                     | 9.7E-5  | T cell receptor signaling pathway (6)       |
|             |    |    | 5.7E-11 | regulation of response to stimulus (11)                             | 1.0E-4  | Graft-versus-host disease (5)               |
|             |    |    | 5.2E-11 | positive regulation of metabolic process (13)                       | 1.3E-4  | Type I diabetes mellitus (5)                |
| <b>JA-2</b> | 11 | 22 | 4.0E-9  | transmembrane receptor protein tyrosine kinase signaling pathway(8) | 5.7E-6  | Focal adhesion (7)                          |
|             |    |    | 2.4E-8  | enzyme linked receptor protein signaling pathway (8)                | 2.5E-3  | Glioma (4)                                  |
|             |    |    | 2.3E-4  | enzyme linked receptor protein signaling pathway (8)                | 4.6E-3  | Prostate cancer (4)                         |
|             |    |    |         |                                                                     | 8.4E-3  | Natural killer cell mediated cytotoxicity   |

|             |    |    |         |                                                      |                                                    |
|-------------|----|----|---------|------------------------------------------------------|----------------------------------------------------|
|             |    |    | 3.3E-4  | protein amino acid phosphorylation (7)               | (4)                                                |
|             |    |    | 7.9E-4  | phosphorylation (7)                                  | 9.3E-3 Pathways in cancer (5)                      |
|             |    |    | 7.9E-4  | phosphorus metabolic process (7)                     | 3.8E-2 Renal cell carcinoma (3)                    |
|             |    |    | 2.1E-3  | phosphate metabolic process (7)                      | 3.9E-2 Chronic myeloid leukemia (3)                |
|             |    |    | 1.9E-3  | post-translational protein modification (7)          | 4.4E-2 ErbB signaling pathway (3)                  |
|             |    |    |         | cell surface receptor linked signal transduction (9) |                                                    |
|             |    |    | 1.8E-3  | multicellular organismal development (9)             |                                                    |
|             |    |    | 1.9E-3  | anatomical structure morphogenesis(7)                |                                                    |
| <b>UA-2</b> | 27 | 80 | 3.1E-22 | immune system process (23)                           | 1.3E-12 NOD-like receptor signaling pathway (11)   |
|             |    |    | 1.8E-17 | immune response (18)                                 |                                                    |
|             |    |    | 2.3E-11 | positive regulation of cytokine production (9)       | 1.9E-12 Toll-like receptor signaling pathway (12)  |
|             |    |    | 2.4E-10 | regulation of cytokine production (10)               | 6.0E-10 Cytosolic DNA-sensing pathway (9)          |
|             |    |    | 5.0E-10 | defense response (13)                                | 8.4E-9 T cell receptor signaling pathway (10)      |
|             |    |    | 1.4E-9  | response to stimulus (21)                            | 1.6E-8 Cytokine-cytokine receptor interaction (12) |
|             |    |    | 1.2E-9  | positive regulation of biological process (18)       |                                                    |
|             |    |    | 7.8E-9  | regulation of immune system process (11)             | 7.3E-8 RIG-I-like receptor signaling pathway (8)   |

|             |    |    |        |                                                                       |        |                                               |
|-------------|----|----|--------|-----------------------------------------------------------------------|--------|-----------------------------------------------|
|             |    |    | 2.1E-8 | positive regulation of multicellular organismal process (9)           | 3.6E-7 | Apoptosis (8)                                 |
|             |    |    |        |                                                                       | 3.4E-5 | Type I diabetes mellitus (6)                  |
|             |    |    | 3.4E-8 | positive regulation of cellular process (16)                          | 4.1E-5 | Adipocytokine signaling pathway (6)           |
|             |    |    |        |                                                                       | 4.6E-5 | MAPK signaling pathway (9)                    |
| <b>UA-6</b> | 55 | 94 | 3.2E-5 | transmembrane receptor protein tyrosine kinase signaling pathway (10) | 6.1E-7 | ErbB signaling pathway (10)                   |
|             |    |    |        |                                                                       | 2.6E-6 | Endometrial cancer (8)                        |
|             |    |    | 2.6E-5 | protein amino acid phosphorylation (15)                               | 2.4E-6 | Fc epsilon RI signaling pathway (9)           |
|             |    |    | 1.7E-5 | enzyme linked receptor protein signaling pathway (11)                 | 1.9E-6 | Focal adhesion (12)                           |
|             |    |    |        |                                                                       | 6.4E-6 | Toll-like receptor signaling pathway (9)      |
|             |    |    | 5.3E-5 | phosphorylation (15)                                                  | 2.0E-5 | T cell receptor signaling pathway (9)         |
|             |    |    | 6.5E-5 | phosphate metabolic process (16)                                      | 2.2E-5 | Non-small cell lung cancer (7)                |
|             |    |    | 6.5E-5 | phosphorus metabolic process (16)                                     | 2.0E-5 | Natural killer cell mediated cytotoxicity (9) |
|             |    |    | 1.2E-4 | post-translational protein modification (17)                          |        |                                               |
|             |    |    | 4.7E-4 | response to stress (17)                                               | 2.6E-5 | Prostate cancer (8)                           |
|             |    |    | 5.4E-4 | immune system process (14)                                            | 6.1E-5 | RIG-I-like receptor signaling pathway (7)     |
|             |    |    | 5.4E-4 | cellular response to stimulus (12)                                    |        |                                               |
| <b>UA-7</b> | 17 | 27 | 6.6E-3 | regulation of phosphorylation (6)                                     | 1.5E-3 | Jak-STAT signaling pathway (6)                |

---

|             |    |    |        |                                                             |        |                                            |
|-------------|----|----|--------|-------------------------------------------------------------|--------|--------------------------------------------|
|             |    |    | 4.0E-3 | regulation of phosphate metabolic process (6)               | 6.6E-3 | Cell cycle (5)                             |
|             |    |    | 4.0E-3 | regulation of phosphorus metabolic process (6)              | 9.1E-3 | Glioma (4)                                 |
|             |    |    | 8.7E-3 | negative regulation of response to stimulus (4)             | 9.6E-3 | Pancreatic cancer (4)                      |
|             |    |    | 2.5E-2 | organ development (9)                                       |        |                                            |
|             |    |    | 2.2E-2 | regulation of cellular metabolic process (11)               |        |                                            |
|             |    |    | 2.1E-2 | regulation of cell proliferation (6)                        |        |                                            |
|             |    |    | 2.4E-2 | regulation of protein amino acid phosphorylation (4)        |        |                                            |
|             |    |    | 2.1E-2 | positive regulation of cellular process (8)                 |        |                                            |
|             |    |    | 1.9E-2 | regulation of metabolic process (11)                        |        |                                            |
| <b>JU-3</b> | 16 | 36 | 8.9E-9 | immune system process (12)                                  | 8.7E-8 | Toll-like receptor signaling pathway (8)   |
|             |    |    | 1.6E-7 | positive regulation of biological process (13)              | 2.3E-5 | Cytokine-cytokine receptor interaction (8) |
|             |    |    | 4.6E-7 | positive regulation of macromolecule metabolic process (10) | 1.8E-5 | Jak-STAT signaling pathway (7)             |
|             |    |    | 5.5E-7 | positive regulation of cellular process (12)                | 5.3E-4 | Hematopoietic cell lineage (5)             |
|             |    |    | 5.4E-7 | positive regulation of metabolic process (10)               | 1.6E-3 | T cell receptor signaling pathway (5)      |
|             |    |    | 6.5E-7 | immune response (9)                                         | 2.3E-3 | Intestinal immune network for IgA          |

---

---

|             |    |    |        |                                                       |         |                                     |
|-------------|----|----|--------|-------------------------------------------------------|---------|-------------------------------------|
|             |    |    | 6.3E-6 | positive regulation of cellular metabolic process (9) |         | production (4)                      |
|             |    |    |        |                                                       | 2.4E-3  | Allograft rejection (4)             |
|             |    |    | 1.2E-5 | response to stimulus (13)                             | 3.2E-3  | Adipocytokine signaling pathway (4) |
|             |    |    | 3.8E-5 | regulation of response to stimulus (7)                | 3.5E-3  | Autoimmune thyroid disease (4)      |
|             |    |    | 1.4E-4 | inflammatory response (6)                             | 1.3E-3  | Asthma (3)                          |
| <b>JU-4</b> | 23 | 46 | 4.5E-9 | regulation of apoptosis (13)                          | 4.5E-12 | Pathways in cancer (14)             |
|             |    |    | 2.6E-9 | regulation of programmed cell death (13)              | 3.1E-10 | Bladder cancer (8)                  |
|             |    |    | 1.8E-9 | regulation of cell death (13)                         | 3.7E-10 | Cell cycle (10)                     |
|             |    |    | 1.9E-9 | positive regulation of biological process (17)        | 4.5E-7  | Pancreatic cancer (7)               |
|             |    |    | 9.6E-8 | positive regulation of cellular process (15)          | 9.8E-7  | Small cell lung cancer (7)          |
|             |    |    | 9.6E-8 | regulation of cell cycle (9)                          | 3.0E-6  | Non-small cell lung cancer (6)      |
|             |    |    | 6.6E-7 | regulation of multicellular organismal process (12)   | 6.0E-6  | Glioma (6)                          |
|             |    |    |        |                                                       | 7.7E-6  | p53 signaling pathway (6)           |
|             |    |    | 9.9E-7 | negative regulation of biological process (14)        | 7.9E-6  | Melanoma (6)                        |
|             |    |    | 4.9E-6 | regulation of cell proliferation (10)                 | 9.9E-6  | Chronic myeloid leukemia (6)        |
|             |    |    | 5.7E-6 | positive regulation of apoptosis (8)                  |         |                                     |

---



**Table S6: The degree, weighted degree and PageRank of each PMD.**

| <b>Module</b> | <b>PMD</b>       | <b>Degree</b> | <b>Average/ Degree</b> | <b>Weighted degree</b> | <b>Average/ Weighted degree</b> | <b>PageRank</b> | <b>Average/ PageRank</b> |
|---------------|------------------|---------------|------------------------|------------------------|---------------------------------|-----------------|--------------------------|
| MJA-1         | $Ifn8_{JA-1}^D$  | 13            | 8.11                   | 12.53                  | 7.43                            | 0.087           | 0.056                    |
|               | $Il6_{JA-1}^D$   | 17            |                        | 16.01                  |                                 | 0.111           |                          |
|               | $Tlr4_{JA-1}^D$  | 12            |                        | 11.05                  |                                 | 0.079           |                          |
| MJA-2         | $Egf_{JA-2}^D$   | 8             | 4                      | 7.16                   | 3.60                            | 0.170           | 0.091                    |
|               | $Grb2_{JA-2}^D$  | 7             |                        | 6.32                   |                                 | 0.152           |                          |
| MUA-2         | $Tnf_{UA-2}^D$   | 23            | 5.93                   | 21.83                  | 5.29                            | 0.133           | 0.037                    |
|               | $Cd4_{UA-2}^D$   | 10            |                        | 9.16                   |                                 | 0.061           |                          |
| MUA-6         | $Ifnb1_{UA-6}^D$ | 8             | 3.42                   | 7.58                   | 3.09                            | 0.040           | 0.018                    |

|       |                                           |    |      |      |      |       |       |
|-------|-------------------------------------------|----|------|------|------|-------|-------|
|       | <i>Grb2</i> <sup>D</sup> <sub>UA-6</sub>  | 8  |      | 7.65 |      | 0.039 |       |
|       | <i>Akt1</i> <sup>D</sup> <sub>UA-6</sub>  | 8  |      | 7.57 |      | 0.041 |       |
| MUA-7 | <i>Il2</i> <sup>D</sup> <sub>UA-7</sub>   | 5  | 3.18 | 4.81 | 2.92 | 0.088 | 0.059 |
|       | <i>Ccnd1</i> <sup>D</sup> <sub>UA-7</sub> | 5  |      | 4.71 |      | 0.086 |       |
| MJU-3 | <i>Il1b</i> <sup>D</sup> <sub>JU-3</sub>  | 11 | 4.5  | 8.85 | 3.91 | 0.139 | 0.063 |
|       | <i>Cd4</i> <sup>D</sup> <sub>JU-3</sub>   | 7  |      | 6.55 |      | 0.086 |       |
|       | <i>Stat1</i> <sup>D</sup> <sub>JU-3</sub> | 4  |      | 3.64 |      | 0.072 |       |
| MJU-4 | <i>Vegfa</i> <sup>D</sup> <sub>JU-4</sub> | 9  | 4    | 8.15 | 3.60 | 0.082 | 0.043 |
|       | <i>Igf1</i> <sup>D</sup> <sub>JU-4</sub>  | 5  |      | 4.52 |      | 0.053 |       |

Note: PMD is pharmacology module drivers, <sup>D</sup> on the upper right corner of gene' name means Driver, and on the lower right corner is its source.

**Table S7: PMD in each group related to cerebral ischemia document verification:**

| <b>Group</b> | <b>PMD</b>        | <b>References</b>             |
|--------------|-------------------|-------------------------------|
| MJA-1        | Il6 <sup>M</sup>  | (Tureyen et al., 2007)        |
|              | Ifng              | (Andersen et al., 2012)       |
|              | Tlr4              | (Hua et al., 2009)            |
| MJA-2        | Egf               | (Teramoto et al., 2003)       |
|              | Grb2              | (Jin et al., 2001)            |
| MUA-2        | Tnf <sup>M</sup>  | (Adibhatla and Hatcher, 2005) |
|              | Cd4               | (Schroeter et al., 2002)      |
| MUA-6        | Akt1              | (Hui et al., 2005)            |
|              | Grb2              | (Jin et al., 2001)            |
|              | Ifnb1             | (Hori et al., 2015)           |
| MUA-7        | Ccnd1             | (Zhao et al., 2013)           |
|              | Il2               | (Zhai et al., 1997)           |
| MJU-3        | Il1b <sup>M</sup> | (Stroemer and Rothwell, 1997) |
|              | Cd4               | (Schroeter et al., 2002)      |
|              | Stat1             | (Takagi et al., 2002)         |

|       |       |                     |
|-------|-------|---------------------|
| MJU-4 | Vegfa | (Nag et al., 2002)  |
|       | Igfl  | (Guan et al., 1993) |

Note: <sup>M</sup> represent the biomarker of cerebral ischemia.

## References

- Adibhatla, R.M., and Hatcher, J.F. (2005). Cytidine 5'-diphosphocholine (CDP-choline) in stroke and other CNS disorders. *Neurochemical research* 30, 15-23.
- Andersen, Z.J., Kristiansen, L.C., Andersen, K.K., Olsen, T.S., Hvidberg, M., Jensen, S.S., Ketzler, M., Loft, S., Sorensen, M., Tjønneland, A., *et al.* (2012). Stroke and long-term exposure to outdoor air pollution from nitrogen dioxide: a cohort study. *Stroke; a journal of cerebral circulation* 43, 320-325.
- Guan, J., Williams, C., Gunning, M., Mallard, C., and Gluckman, P. (1993). The effects of IGF-1 treatment after hypoxic-ischemic brain injury in adult rats. *Journal of cerebral blood flow and metabolism : official journal of the International Society of Cerebral Blood Flow and Metabolism* 13, 609-616.
- Hori, M., Nakamachi, T., Shibato, J., Rakwal, R., Shioda, S., and Numazawa, S. (2015). Unraveling the Specific Ischemic Core and Penumbra Transcriptome in the Permanent Middle Cerebral Artery Occlusion Mouse Model Brain Treated with the Neuropeptide PACAP38. *Microarrays* 4, 2-24.
- Hua, F., Ma, J., Ha, T., Kelley, J.L., Kao, R.L., Schweitzer, J.B., Kalbfleisch, J.H., Williams, D.L., and Li, C. (2009). Differential roles of TLR2 and TLR4 in acute focal cerebral ischemia/reperfusion injury in mice. *Brain research* 1262, 100-108.
- Hui, L., Pei, D.S., Zhang, Q.G., Guan, Q.H., and Zhang, G.Y. (2005). The neuroprotection of insulin on ischemic brain injury in rat hippocampus through negative regulation of JNK signaling pathway by PI3K/Akt activation. *Brain research* 1052, 1-9.
- Jin, K., Mao, X.O., Eshoo, M.W., Nagayama, T., Minami, M., Simon, R.P., and Greenberg, D.A. (2001). Microarray analysis of hippocampal gene expression in global cerebral ischemia. *Annals of neurology* 50, 93-103.
- Nag, S., Eskandarian, M.R., Davis, J., and Eubanks, J.H. (2002). Differential expression of vascular endothelial growth factor-A (VEGF-A) and VEGF-B after brain injury. *Journal of neuropathology and experimental neurology* 61, 778-788.
- Schroeter, M., Jander, S., and Stoll, G. (2002). Non-invasive induction of focal cerebral ischemia in mice by photothrombosis of cortical microvessels: characterization of inflammatory responses. *Journal of neuroscience methods* 117, 43-49.
- Stroemer, R.P., and Rothwell, N.J. (1997). Cortical protection by localized striatal injection of IL-1ra following cerebral ischemia in the rat. *Journal of cerebral blood flow and metabolism : official journal of the International Society of Cerebral Blood Flow and Metabolism* 17, 597-604.
- Takagi, Y., Harada, J., Chiarugi, A., and Moskowitz, M.A. (2002). STAT1 is activated in neurons after ischemia and contributes to ischemic brain injury. *Journal of Cerebral*

Blood Flow & Metabolism 22, 1311-1318.

Teramoto, T., Qiu, J., Plumier, J.C., and Moskowitz, M.A. (2003). EGF amplifies the replacement of parvalbumin-expressing striatal interneurons after ischemia. *The Journal of clinical investigation* 111, 1125-1132.

Tureyen, K., Kapadia, R., Bowen, K.K., Satriotomo, I., Liang, J., Feinstein, D.L., and Vemuganti, R. (2007). Peroxisome proliferator-activated receptor-gamma agonists induce neuroprotection following transient focal ischemia in normotensive, normoglycemic as well as hypertensive and type-2 diabetic rodents. *Journal of neurochemistry* 101, 41-56.

Zhai, Q.H., Futrell, N., and Chen, F.J. (1997). Gene expression of IL-10 in relationship to TNF-alpha, IL-1beta and IL-2 in the rat brain following middle cerebral artery occlusion. *Journal of the neurological sciences* 152, 119-124.

Zhao, H., Wang, J., Gao, L., Wang, R., Liu, X., Gao, Z., Tao, Z., Xu, C., Song, J., Ji, X., *et al.* (2013). MiRNA-424 protects against permanent focal cerebral ischemia injury in mice involving suppressing microglia activation. *Stroke; a journal of cerebral circulation* 44, 1706-1713.
